# Supplementary material for: Promotion of Wound Healing and Prevention of Frostbite Injury in Rat Skin by Exopolysaccharide from the Arctic Marine Bacterium Polaribacter sp. SM1127
Source: MDPI journal article supplement (doi:10.3390/md18010048), 2020-01-11
Supplement: s1 [file s1]

# Promotion of Wound Healing and Prevention of Frostbite Injury in Rat Skin by Exopolysaccharide from the Arctic Marine Bacterium *Polaribacter* sp. SM1127

Mei-Ling Sun <sup>1</sup>, Fang Zhao<sup>1</sup>, Xiu-Lan Chen <sup>1,2</sup>, Xi-Ying Zhang <sup>1,2</sup>, Yu-Zhong Zhang <sup>1,2,3</sup>, Xiao-Yan Song <sup>1</sup>, Cai-Yun Sun <sup>1</sup> and Jie Yang <sup>1,\*</sup>

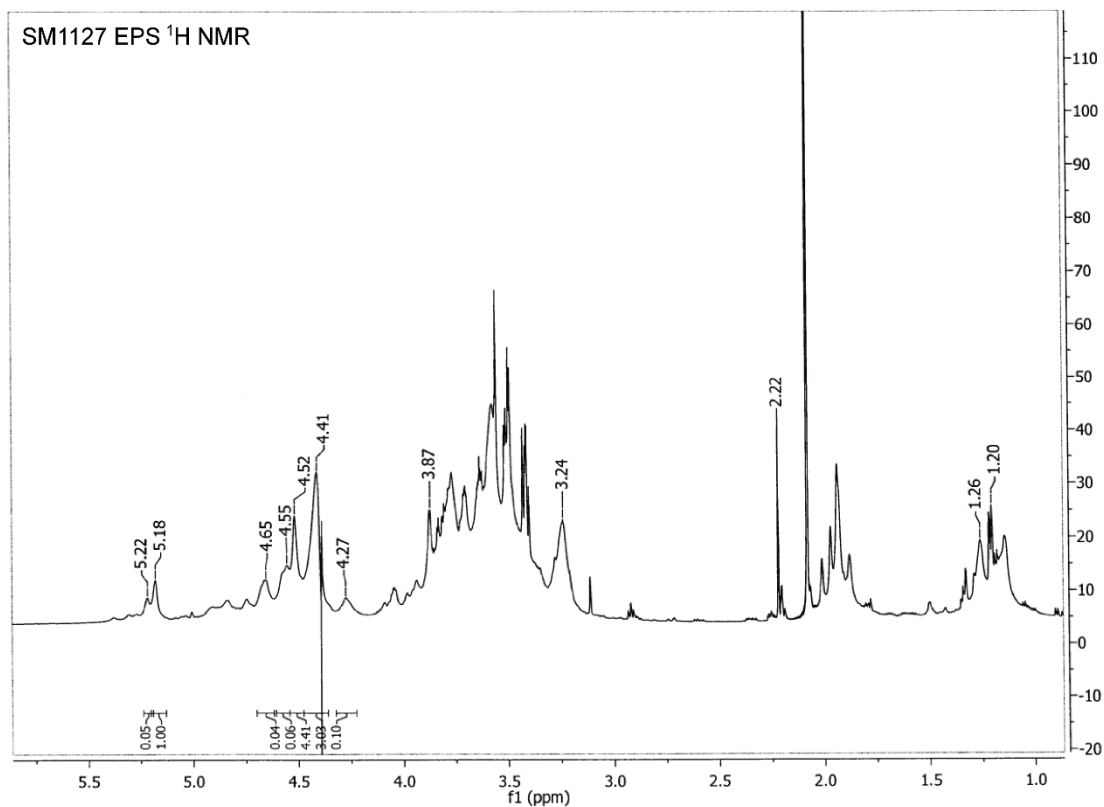

**Figure S1.** <sup>1</sup>H NMR spectrum of SM1127 EPS on a Varian Inova-500 MHz Bruker NMR spectrometer at 70°C ( $\delta_{\text{H}}=2.225$  ppm).

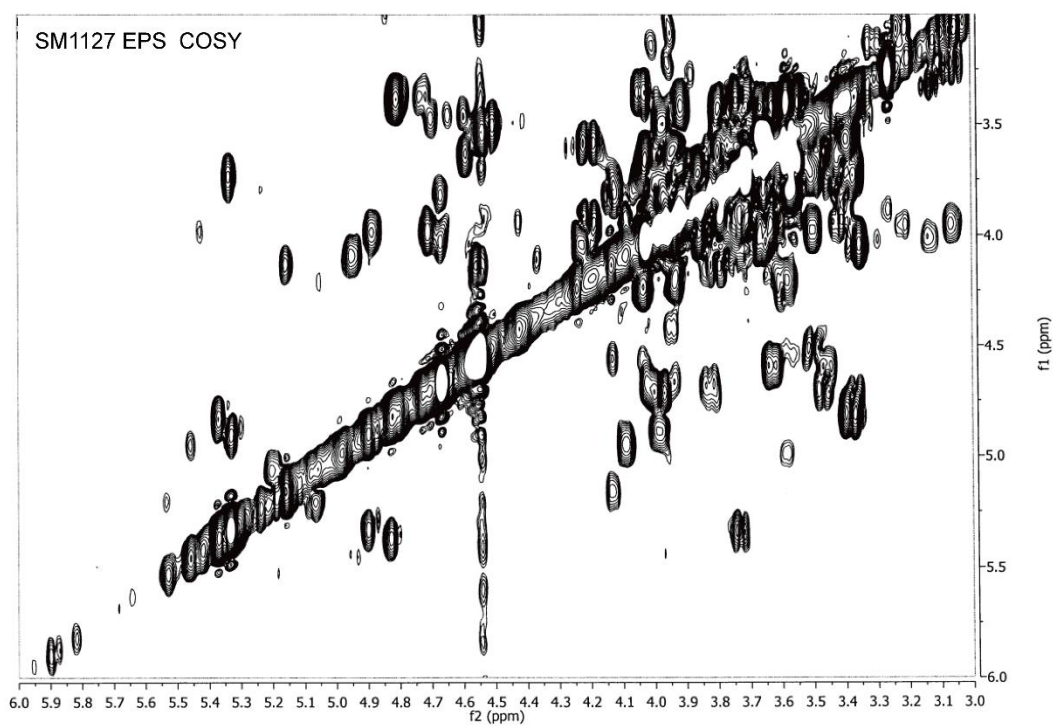

**Figure S2.** COSY spectrum of SM1127 EPS on a Varian Inova-500 MHz Bruker NMR spectrometer at 70°C ( $\delta_c=30.89$  ppm).

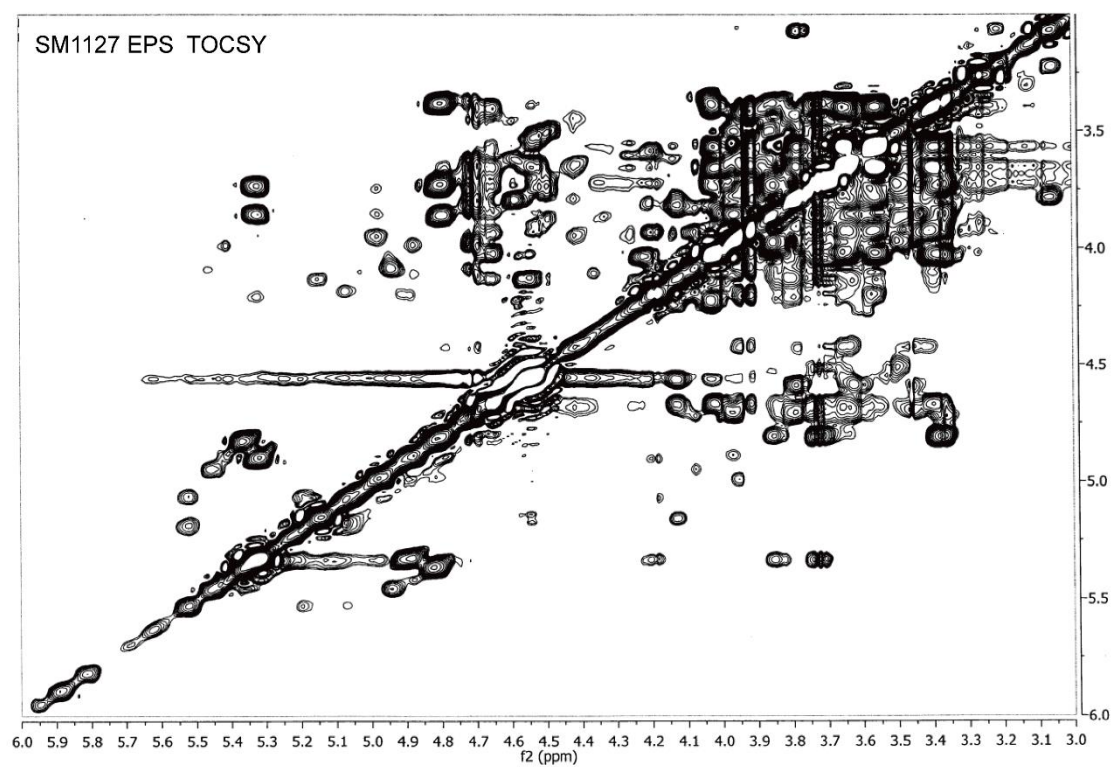

**Figure S3.** TOCSY spectrum of SM1127 EPS on a Varian Inova-500 MHz Bruker NMR spectrometer at 70°C ( $\delta_C=30.89$  ppm).

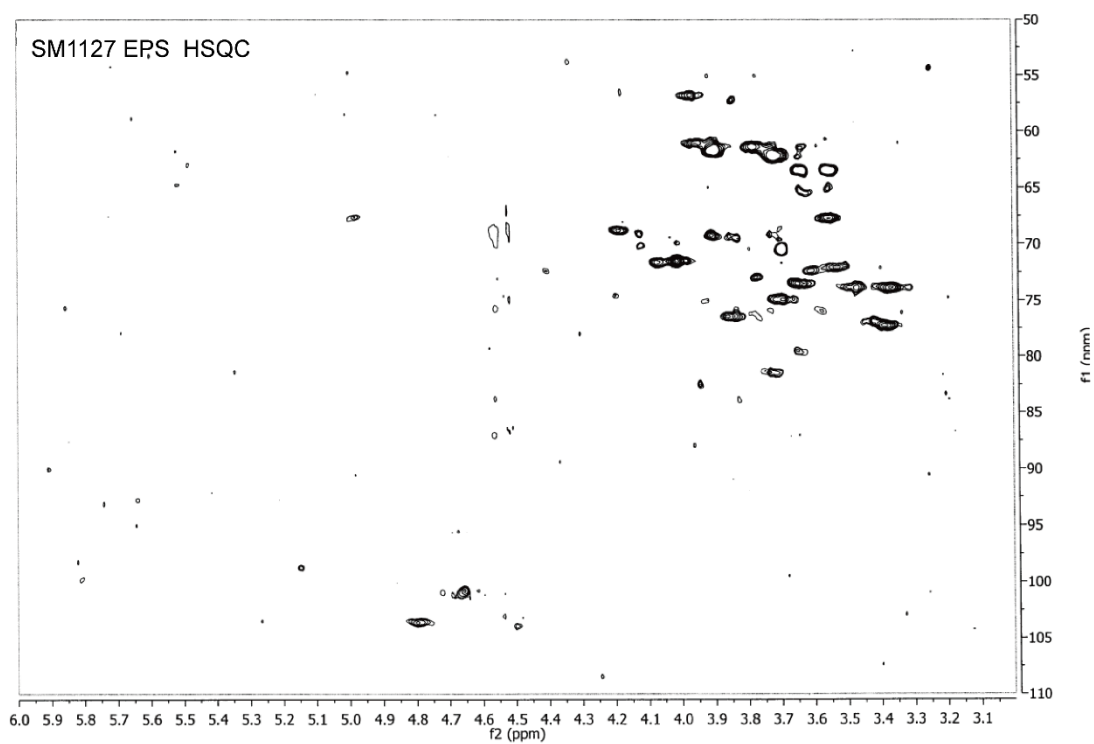

**Figure S4.** HSQC spectrum of SM1127 EPS on a Varian Inova-500 MHz Bruker NMR spectrometer at 70°C ( $\delta_H=2.225$  ppm,  $\delta_C=30.89$  ppm).
